# Supplementary material
Source: MDPI journal article supplement (https://www.mdpi.com/2312-7481/9/1/4)
Supplement: s1 [file s1]

# The Assembly of Grid-type Lanthanide Cluster

Jinsong Li <sup>1</sup>, Fan Zhang <sup>1</sup>, Xuefeng Guo <sup>2</sup>, Dan Liu <sup>2,\*</sup> and Jianfeng Wu <sup>1,\*</sup>

<sup>1</sup> School of Chemistry and Chemical Engineering, Northwestern Polytechnical University, Xi'an 710072, China

<sup>2</sup> Institute of Flexible Electronics (IFE), Northwestern Polytechnical University, Xi'an 710072, China

\* Correspondence: iamdliu@nwpu.edu.cn (D.L.); jf.wu.chem@gmail.com (J.W.)

## Contents:

- S1. General Synthetic Considerations
- S2. NMR Spectroscopy
- S3. IR spectra
- S4. Crystallographic Details
- S5. Direct current (dc) magnetic susceptibility measurements
- S6. Alternating current (ac) magnetic susceptibility measurements
- S7. CC-Fit results
- S8. Magellan calculations
- S9. References

### S1. General Synthetic Considerations

All chemicals and solvents were commercially obtained and used as received without any further purification. Both 4,6-dihydrazineylpyrimidine and 6-(hydroxymethyl)-2-carbaldehyde-pyridine were synthesized by the procedure based on the literature.[1,2] The IR measurements of solid samples were performed on a Perkin-Elmer Fourier transform infrared (FTIR) spectrophotometer using the reflectance technique (4000–400 cm<sup>-1</sup>), and samples were prepared as KBr disks. IR bands (Figure S7) were labeled according to their relative intensities with vs. (very strong), s (strong), m (medium), and w (weak). Elemental analyses for C, H, and N were carried out on a Perkin-Elmer 2400 analyzer. <sup>1</sup>H NMR spectra were recorded on a Bruker Avance 500 MHz spectrometer. Chemical shifts are reported in ppm relative to residual proton or carbon signals of the solvents DMSO-*d*<sub>6</sub> (δ<sub>H</sub> = 2.50 ppm).

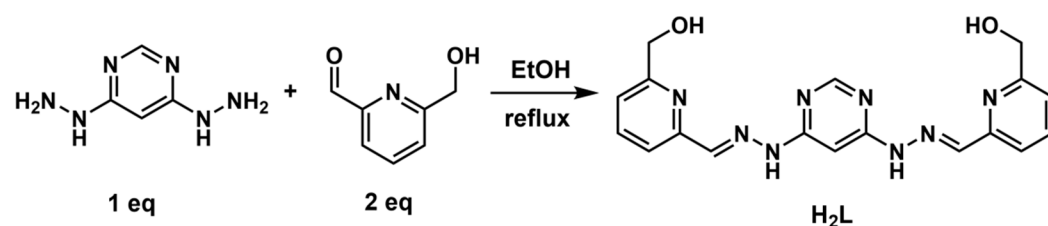

**Figure S1.** Schematic drawings of the synthetic route of ligand H<sub>2</sub>L.

### S2. NMR Spectroscopy

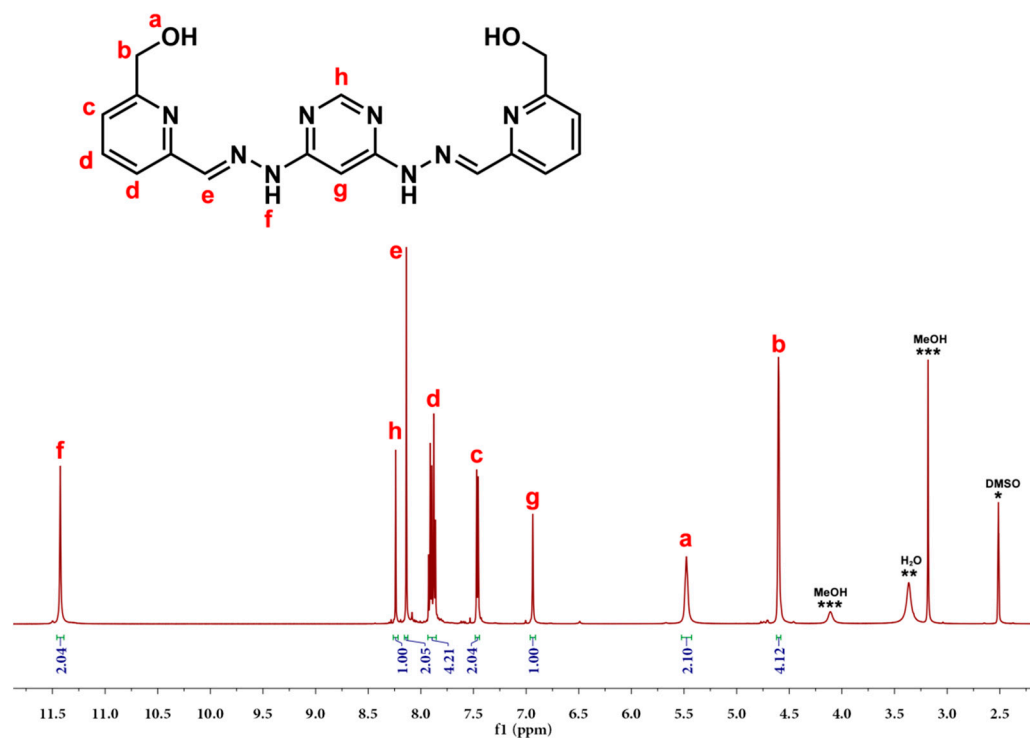

**Figure S2.** <sup>1</sup>H-NMR spectrum of ligand **H<sub>2</sub>L** in DMSO-*d*<sub>6</sub> recorded at room temperature. Solvent peaks are marked with asterisks (DMSO-*d*<sub>6</sub>, \*; H<sub>2</sub>O, \*\*; MeOH, \*\*\*).

## S2. IR spectra

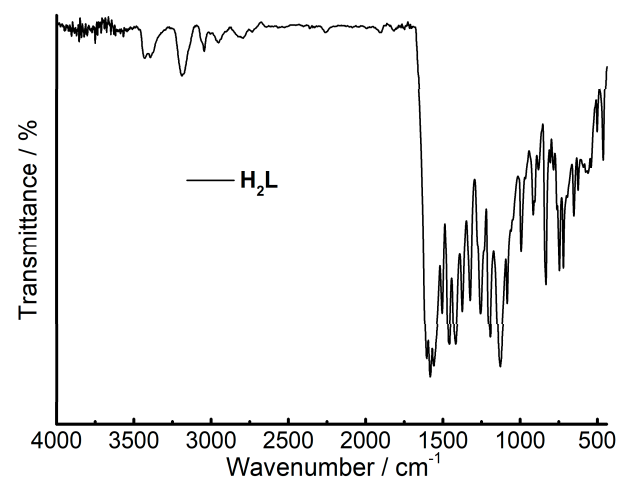

**Figure S3.** IR spectrum of solid samples of ligand **H<sub>2</sub>L**.

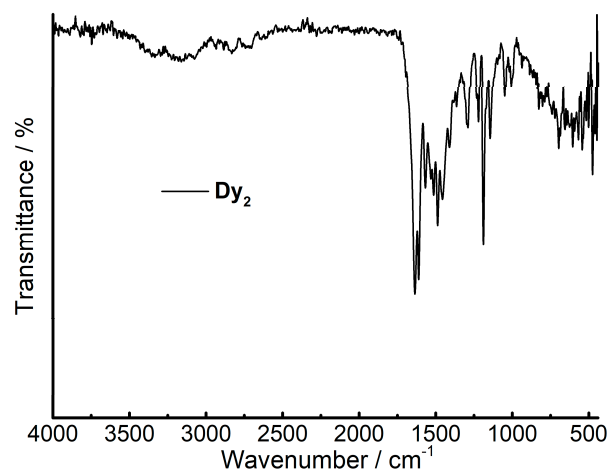

**Figure S4.** IR spectrum of solid samples of complex **Dy<sub>2</sub>**.

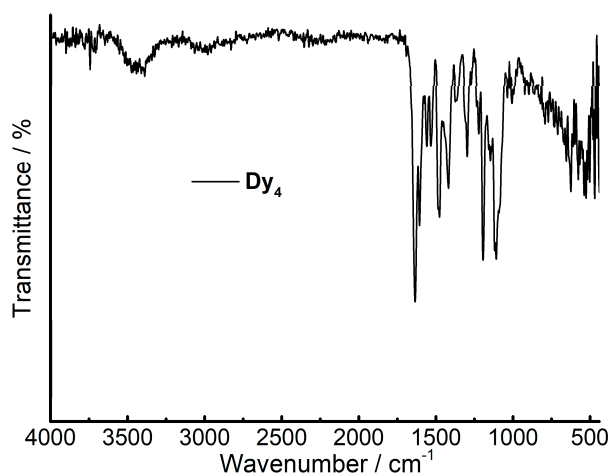

**Figure S5.** IR spectrum of solid samples of complex **Dy<sub>4</sub>**.

### S3. Crystallographic Details

**Table S1.** Crystallographic data of **Dy<sub>2</sub>** and **Dy<sub>4</sub>**.

| Complexes                           | <b>Dy<sub>2</sub></b>                                                                          | <b>Dy<sub>4</sub></b>                                                                            |
|-------------------------------------|------------------------------------------------------------------------------------------------|--------------------------------------------------------------------------------------------------|
| empirical formula                   | C <sub>18</sub> H <sub>44</sub> Br <sub>6</sub> Dy <sub>2</sub> N <sub>8</sub> O <sub>15</sub> | C <sub>84</sub> H <sub>120</sub> Cl <sub>4</sub> Dy <sub>4</sub> N <sub>32</sub> O <sub>40</sub> |
| formula weight, g·mol <sup>-1</sup> | 1417.07                                                                                        | 3009.91                                                                                          |
| crystal size, mm <sup>3</sup>       | 0.21 × 0.19 × 0.17                                                                             | 0.22 × 0.21 × 0.2                                                                                |
| crystal system                      | Triclinic                                                                                      | Tetragonal                                                                                       |
| space group                         | <i>P</i> -1                                                                                    | <i>P</i> 4 <sub>2</sub> / <i>nmc</i>                                                             |
| <i>T</i> , K                        | 293(2)                                                                                         | 296.15                                                                                           |
| <i>λ</i> , Å                        | 0.71073                                                                                        | 0.71073                                                                                          |
| <i>a</i> , Å                        | 11.5795(19)                                                                                    | 20.7954(6)                                                                                       |
| <i>b</i> , Å                        | 13.976(2)                                                                                      | 20.7954(6)                                                                                       |
| <i>c</i> , Å                        | 14.945(3)                                                                                      | 13.6931(7)                                                                                       |
| <i>α</i> , °                        | 113.935(3)                                                                                     | 90                                                                                               |
| <i>β</i> , °                        | 92.357(4)                                                                                      | 90                                                                                               |
| <i>γ</i> , °                        | 110.104(3)                                                                                     | 90                                                                                               |
| <i>V</i> , Å <sup>3</sup>           | 2029.5(6)                                                                                      | 5921.6(5)                                                                                        |
| <i>Z</i>                            | 2                                                                                              | 2                                                                                                |
| <i>ρ</i> (cal), g·cm <sup>-3</sup>  | 2.319                                                                                          | 1.688                                                                                            |
| <i>F</i> (000)                      | 1340.0                                                                                         | 3000.0                                                                                           |
| 2θ range [°]                        | 3.05 to 52.152                                                                                 | 3.562 to 52.126                                                                                  |

|                                              |                |                  |
|----------------------------------------------|----------------|------------------|
| Tmin / Tmax                                  | 0.152 / 0.195  | 0.560 / 0.585    |
| measured refl.                               | 12854          | 35701            |
| unique refl. [Rint]                          | 7984, 0.0455   | 3103, 0.0638     |
| goodness-of-fit ( $F^2$ )                    | 1.015          | 1.085            |
| data / restr. / param.                       | 7984 / 8 / 471 | 3103 / 242 / 230 |
| $R1, wR2$ ( $I > 2\sigma(I)$ )               | 0.0465, 0.1093 | 0.0572, 0.1629   |
| $R1, wR2$ (all data)                         | 0.0654, 0.1187 | 0.0871, 0.1933   |
| res. el. dens. [ $e \cdot \text{\AA}^{-3}$ ] | 2.16 / -1.49   | 1.95 / -0.81     |

$$R_1 = \sum (|F_o| - |F_c|) / \sum |F_o|; \quad \omega R_2 = \left[ \sum \omega (|F_o| - |F_c|)^2 / \sum \omega F_o^2 \right]^{1/2}$$

**Table S2.** Selected bond distances ( $\text{\AA}$ ) in complexes **Dy<sub>2</sub>** and **Dy<sub>4</sub>**.

| <b>Dy<sub>2</sub></b> |          |        |          | <b>Dy<sub>4</sub></b> |          |
|-----------------------|----------|--------|----------|-----------------------|----------|
| Dy1-N4                | 2.512(6) | Dy2-N7 | 2.569(7) | Dy1-N2                | 2.488(6) |
| Dy1-N2                | 2.531(6) | Dy2-N8 | 2.498(6) | Dy1-N2#               | 2.488(6) |
| Dy1-N1                | 2.522(6) | Dy2-N5 | 2.525(6) | Dy1-N4#               | 2.543(6) |
| Dy1-O1                | 2.447(5) | Dy2-O2 | 2.388(5) | Dy1-N4                | 2.543(6) |
| Dy1-O12               | 2.371(5) | Dy2-O7 | 2.398(6) | Dy1-N1                | 2.437(3) |
| Dy1-O8                | 2.384(5) | Dy2-O5 | 2.437(6) | Dy1-N1#               | 2.437(6) |
| Dy1-O10               | 2.423(6) | Dy2-O4 | 2.447(6) | Dy1-O1                | 2.273(6) |
| Dy1-O9                | 2.380(6) | Dy2-O3 | 2.409(5) | Dy1-O1#               | 2.273(6) |
| Dy1-O11               | 2.462(5) | Dy2-O6 | 2.419(6) |                       |          |

Symmetry code: # 1-Y, 1-X, 1/2-Z;

**Table S3.** Selected bond angles ( $^\circ$ ) in complexes **Dy<sub>2</sub>** and **Dy<sub>4</sub>**.

| <b>Dy<sub>2</sub></b> |            |           |          | <b>Dy<sub>4</sub></b> |            |
|-----------------------|------------|-----------|----------|-----------------------|------------|
| N4-Dy1-N1             | 123.40(19) | O2-Dy2-N7 | 120.8(2) | N2-Dy1-N4#            | 82.4(2)    |
| O1-Dy1-N2             | 121.94(19) | O2-Dy2-O7 | 75.5(2)  | N4#-Dy1-N4            | 77.7(3)    |
| O1-Dy1-O11            | 122.8(2)   | O2-Dy2-O4 | 112.9(2) | N1-Dy1-N4#            | 87.81(18)  |
| O12-Dy1-N4            | 82.4(2)    | O7-Dy2-N8 | 75.1(2)  | N1-Dy1-N4             | 126.85(18) |
| O12-Dy1-O10           | 91.9(2)    | O7-Dy2-N5 | 77.8(2)  | N1#-Dy1-N4            | 87.8(5)    |
| O8-Dy1-N1             | 77.62(19)  | O5-Dy2-N5 | 82.6(2)  | O1-Dy1-N2#            | 78.1(2)    |
| O10-Dy1-N2            | 131.9(2)   | O4-Dy2-N7 | 126.3(2) | O1#-Dy1-N2#           | 130.3(2)   |
| O10-Dy1-N1            | 89.2(2)    | O3-Dy2-N7 | 125.7(2) | O1#-Dy1-N4            | 89.0(3)    |
| O9-Dy1-N4             | 89.1(2)    | O3-Dy2-N8 | 79.9(2)  | O1#-Dy1-N1            | 88.1(2)    |
| O9-Dy1-N1             | 81.5(2)    | O3-Dy2-O5 | 104.4(2) | O1-Dy1-O1#            | 107.4(4)   |
| O9-Dy1-O1             | 124.4(2)   | O6-Dy2-N8 | 86.5(2)  |                       |            |
| O11-Dy1-N2            | 114.6(2)   | O6-Dy2-N5 | 80.8(2)  |                       |            |

Symmetry code: # 1-Y, 1-X, 1/2-Z;

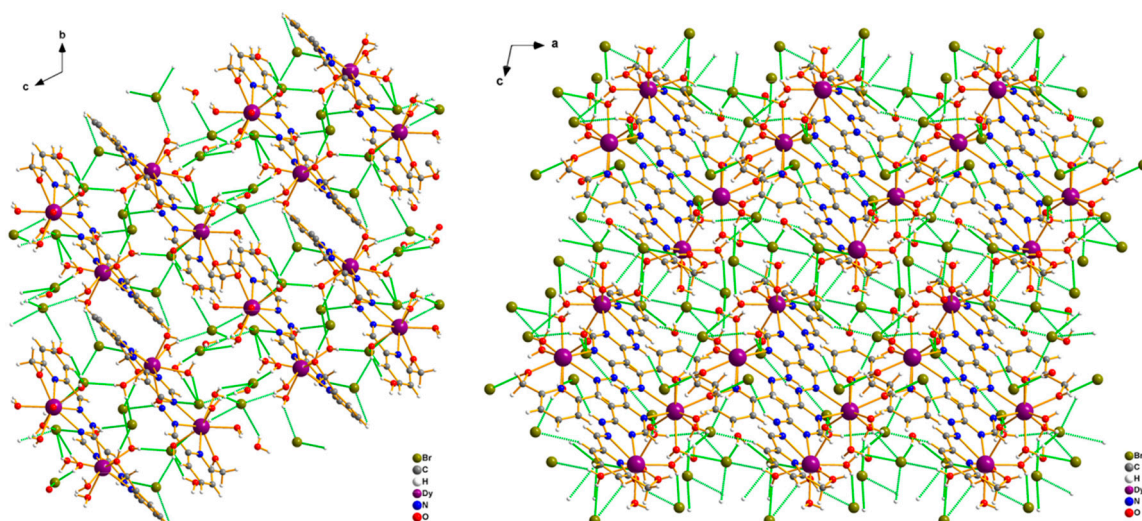

**Figure S6.** Packing models along *a* and *b* axes of complex **Dy<sub>2</sub>**.

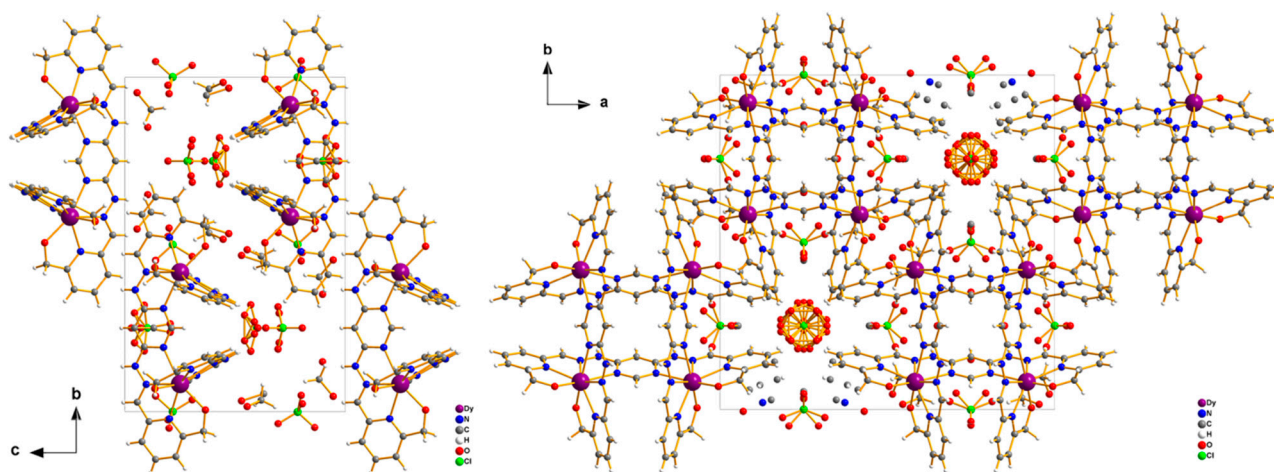

**Figure S7.** Packing models along *a* and *b* axes of complex **Dy<sub>4</sub>**.

**Table S4.** The *CShM* values calculated by *SHAPE* 2.1 [3,4] of Dy<sup>III</sup> ions in **Dy<sub>2</sub>** and **Dy<sub>4</sub>**.

| <b>Dy<sub>2</sub></b>                    |        |        | <b>Dy<sub>4</sub></b>                            |        |  |
|------------------------------------------|--------|--------|--------------------------------------------------|--------|--|
| Coordination Geometry                    | Dy1    | Dy2    | Coordination Geometry                            | Dy1    |  |
| Johnson triangular cupola J3 (C3v)       | 14.326 | 15.714 | Hexagonal bipyramid (D6h)                        | 13.146 |  |
| Capped cube J8 (C4v)                     | 8.619  | 8.037  | Cube (Oh)                                        | 11.207 |  |
| Spherical-relaxed capped cube (C4v)      | 7.510  | 7.052  | Square antiprism (D4d)                           | 6.016  |  |
| Capped square antiprism J10 (C4v)        | 2.557  | 1.465  | Triangular dodecahedron (D2d)                    | 3.675  |  |
| Spherical capped square antiprism (C4v)  | 1.470  | 0.743  | Johnson gyrobifastigium J26 (D2d)                | 10.056 |  |
| Tricapped trigonal prism J51 (D3h)       | 2.443  | 2.962  | Johnson elongated triangular bipyramid J14 (D3h) | 22.625 |  |
| Spherical tricapped trigonal prism (D3h) | 1.508  | 1.865  | Biaugmented trigonal prism J50 (C2v)             | 4.037  |  |
| Tridiminshed icosahedron J63 (C3v)       | 11.995 | 11.488 | Biaugmented trigonal prism (C2v)                 | 3.284  |  |
| Hula-hoop (C2v)                          | 9.342  | 10.518 | Snub diphenoid J84 (D2d)                         | 3.944  |  |
| Muffin (Cs)                              | 1.369  | 1.292  |                                                  |        |  |

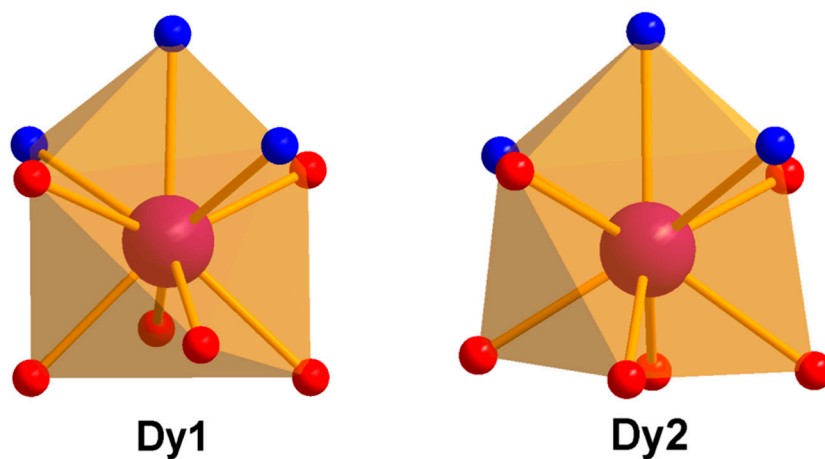

**Figure S8.** Coordination polyhedrons of Dy<sup>III</sup> ions in complex **Dy2**.

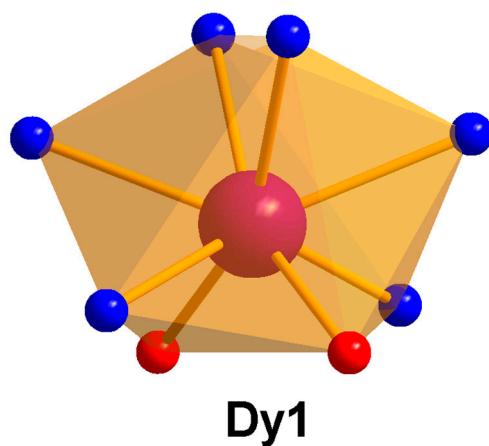

**Figure S9.** Coordination polyhedrons of Dy<sup>III</sup> ions in complex **Dy4**.

### S5. Direct current (dc) magnetic susceptibility measurements

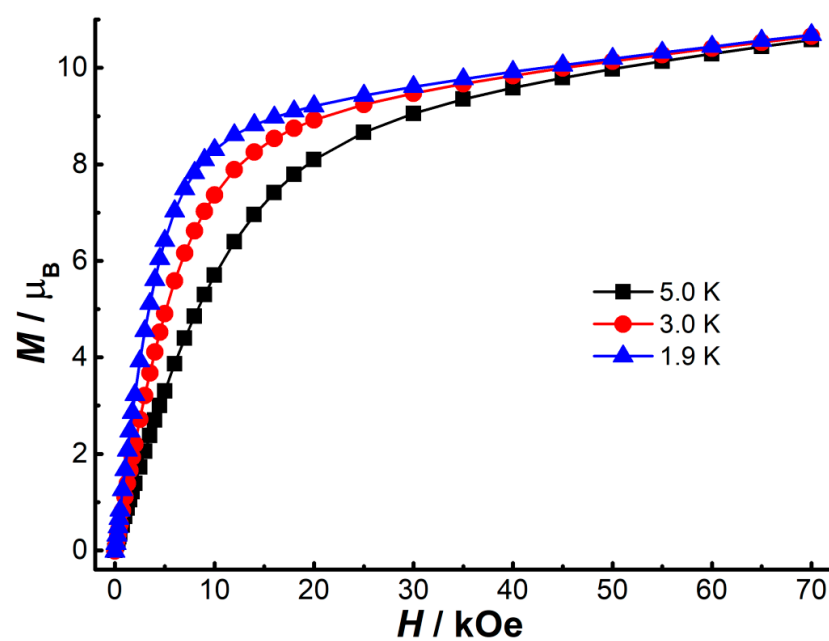

**Figure S10.** Molar magnetization ( $M$ ) vs. field ( $H$ ) of **Dy2** at indicated temperatures.

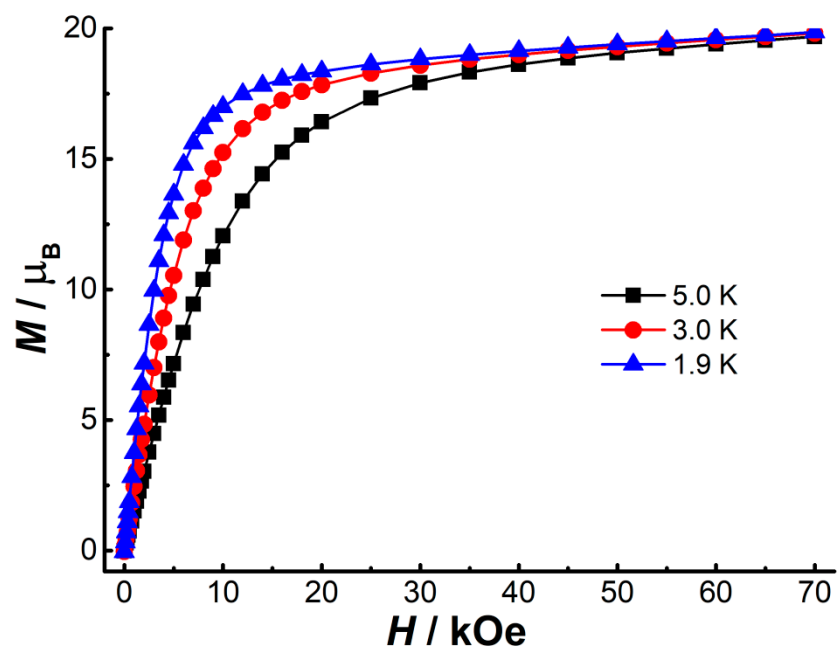

Figure S11. Molar magnetization ( $M$ ) vs. field ( $H$ ) of  $\text{Dy}_4$  at indicated temperatures.

#### S6. Alternating current (ac) magnetic susceptibility measurements

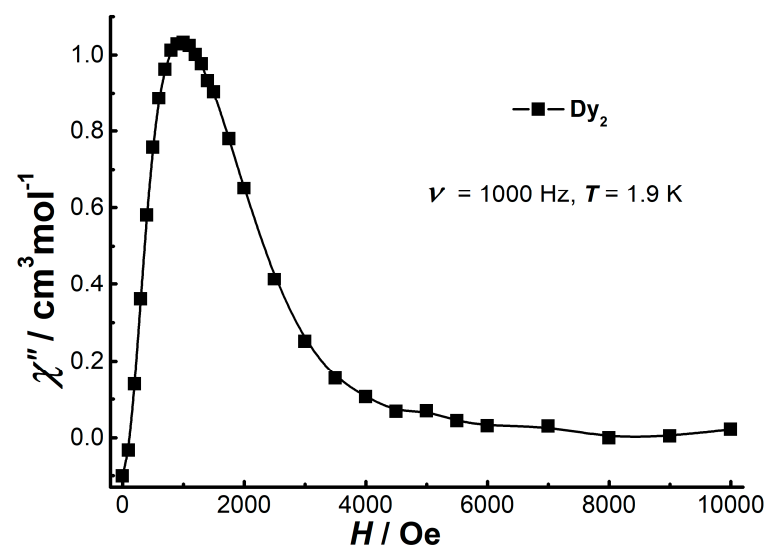

Figure S12. Field-dependent out-of-phase ac susceptibility of  $\text{Dy}_2$  at 1.9 K with a frequency of 1000 Hz.

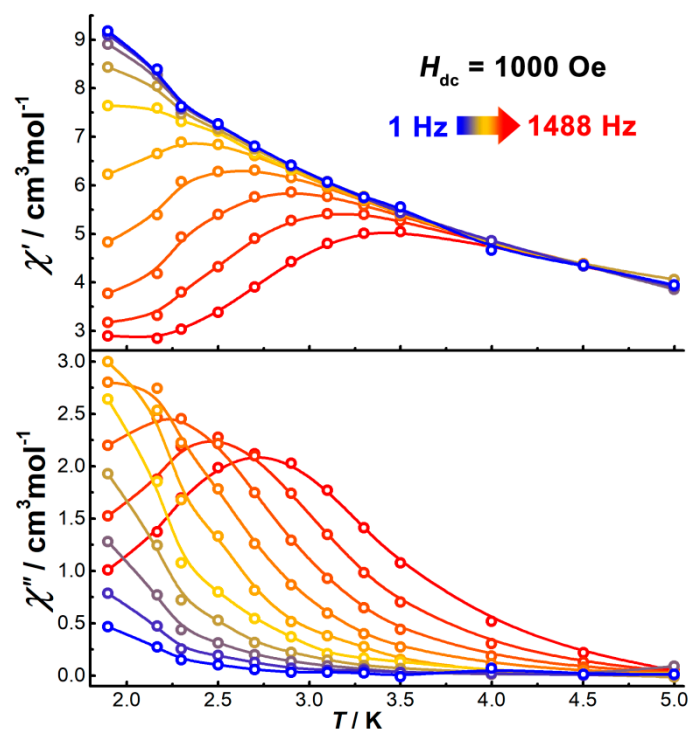

**Figure S13.** Temperature-dependent ac susceptibility of  $\text{Dy}_2$  at indicated frequencies under 1000 Oe dc field.

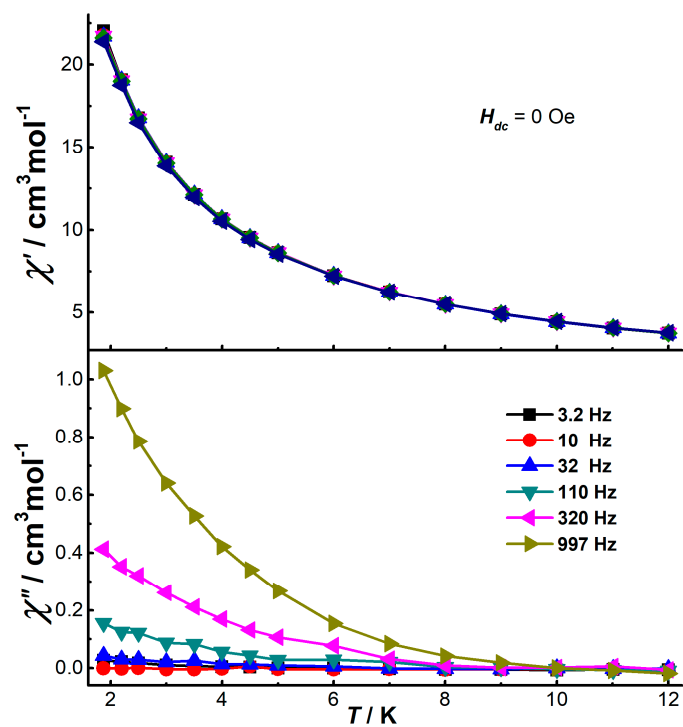

**Figure S14.** Temperature-dependent ac susceptibility of  $\text{Dy}_4$  at zero dc field.



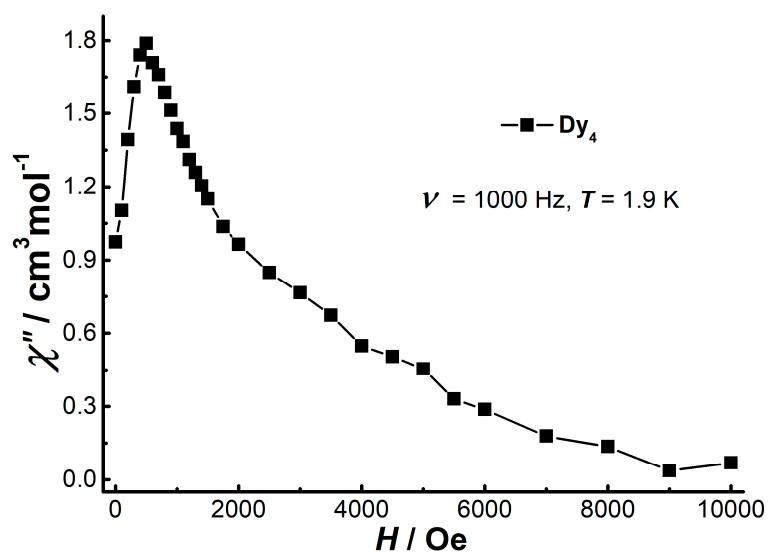

**Figure S15.** Field-dependent ac susceptibility of  $\text{Dy}_4$  at 1.9 K with a frequency of 1000 Hz.

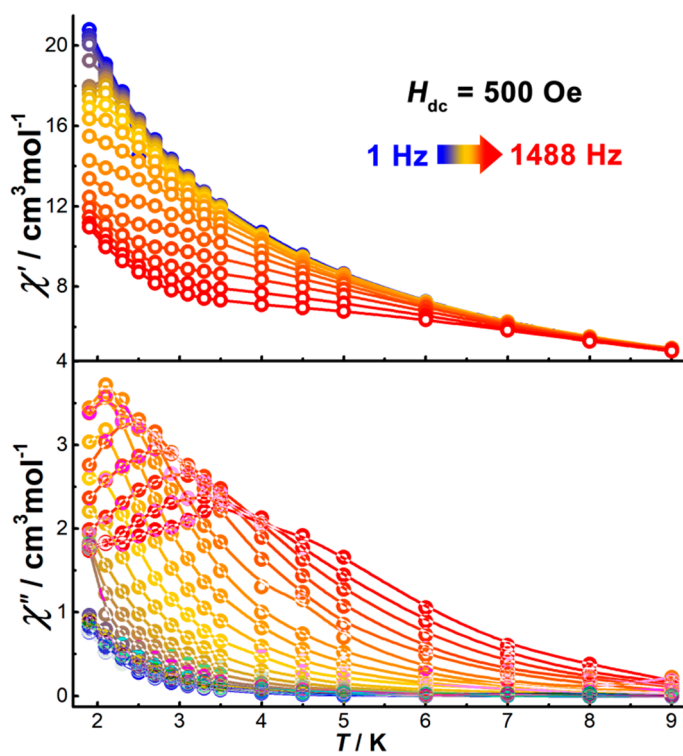

**Figure S16.** Temperature-dependent ac susceptibility of  $\text{Dy}_4$  at indicated frequencies under 500 Oe dc field.

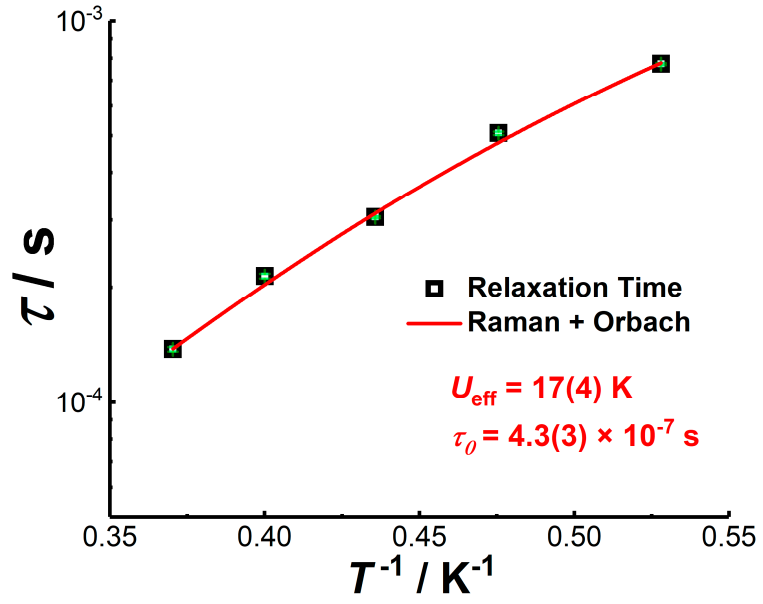

**Figure S17.** Plots of  $\tau$  vs.  $T^{-1}$  for  $\text{Dy}_2$  obtained under 1000 Oe dc fields. The red lines represent the best fit.

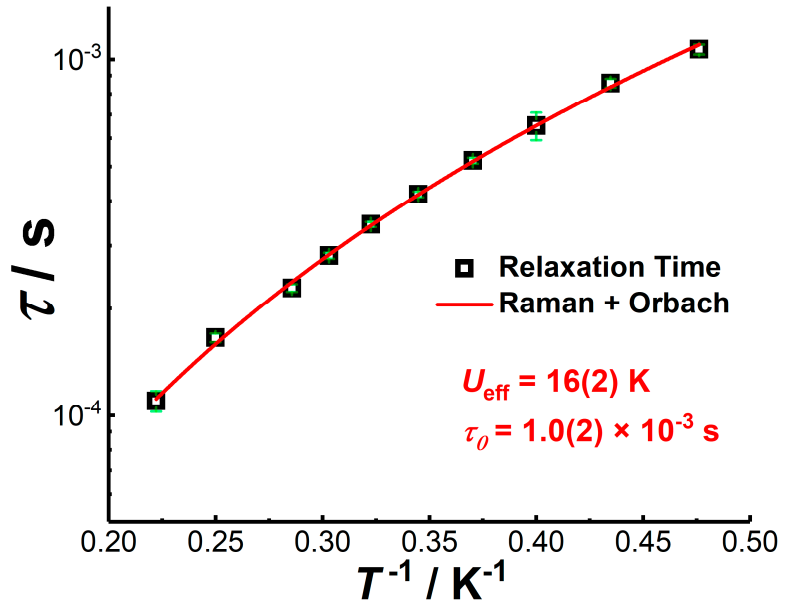

**Figure S18.** Plots of  $\tau$  vs.  $T^{-1}$  for  $\text{Dy}_4$  obtained under 500 Oe dc fields. The red lines represent the best fit.

## S7. CC-Fit results

**Table S5.** CC-Fit results for frequency-dependent ac susceptibility of  $\text{Dy}_2$  under 1000 Oe dc field.

| $T / \text{K}$ | $\chi^s$ | $\chi^r$ | $\tau / \text{s}$ | $\tau_{\text{err}}$ | $\alpha$ | $\alpha_{\text{err}}$ |
|----------------|----------|----------|-------------------|---------------------|----------|-----------------------|
| 1.89385        | 2.74234  | 9.55077  | 7.72543E-4        | 5.12499E-6          | 0.05495  | 0.00392               |
| 2.10264        | 2.48729  | 8.70245  | 5.07341E-4        | 5.11869E-6          | 0.0582   | 0.00578               |
| 2.29491        | 2.34242  | 7.89523  | 3.04647E-4        | 2.0003E-6           | 0.05425  | 0.0035                |
| 2.49951        | 2.16375  | 7.52685  | 2.13948E-4        | 3.07678E-6          | 0.0714   | 0.00657               |
| 2.69979        | 2.0055   | 7.04531  | 1.37468E-4        | 1.92458E-6          | 0.07621  | 0.00509               |

**Table S6.** CC-Fit results of frequency-dependent ac susceptibility of  $\text{Dy}_4$  under 500 Oe dc field.

| $T / \text{K}$ | $\chi^s$ | $\chi^T$ | $\tau / \text{s}$ | $\tau_{err}$ | $\alpha$ | $\alpha_{err}$ |
|----------------|----------|----------|-------------------|--------------|----------|----------------|
| 2.09997        | 0.04121  | 0.08594  | 0.00107           | 3.464E-5     | 0.20558  | 0.01471        |
| 2.29992        | 0.038    | 0.07985  | 8.57297E-4        | 2.42292E-5   | 0.18494  | 0.01308        |
| 2.50004        | 0.03533  | 0.07315  | 6.50848E-4        | 5.79072E-5   | 0.15318  | 0.04271        |
| 2.69997        | 0.03206  | 0.06921  | 5.19327E-4        | 1.00097E-5   | 0.17417  | 0.0085         |
| 2.89986        | 0.02964  | 0.06487  | 4.17852E-4        | 7.67784E-6   | 0.18093  | 0.00759        |
| 3.09965        | 0.02787  | 0.06105  | 3.43886E-4        | 5.66543E-6   | 0.17821  | 0.0065         |
| 3.29977        | 0.0258   | 0.05762  | 2.80857E-4        | 5.53424E-6   | 0.18457  | 0.00715        |
| 3.49982        | 0.02395  | 0.05462  | 2.28093E-4        | 5.53726E-6   | 0.19263  | 0.00795        |
| 4.00014        | 0.02219  | 0.04826  | 1.65342E-4        | 4.64493E-6   | 0.19196  | 0.00798        |
| 4.50009        | 0.0192   | 0.04325  | 1.09882E-4        | 7.36767E-6   | 0.21809  | 0.01437        |

**Table S7.** Parameters with standard error obtained from fitting the plots of the relaxation time  $\tau$  vs.  $1/T$  for  $\text{Dy}_2$  and  $\text{Dy}_4$ .

| $T / \text{K}$          | $U_{eff} / \text{K}$ | $\tau_0 / \text{s}$ | $C$    | $n$    |
|-------------------------|----------------------|---------------------|--------|--------|
| $\text{Dy}_2$ (1000 Oe) | 17(4)                | 4.2(3)E-7           | 144(5) | 3(0.3) |
| $\text{Dy}_4$ (500 Oe)  | 16(2)                | 1.0(2)E-3           | 98(9)  | 3(0.8) |

### S8. Magellan calculations

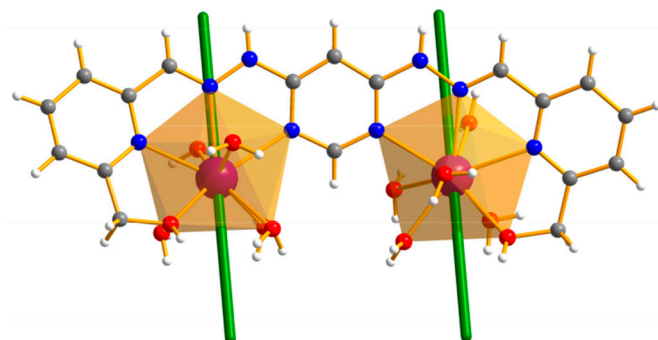

**Figure S19.** Top view of the orientations of the main magnetic axes of the ground state of  $\text{Dy}_2$ .

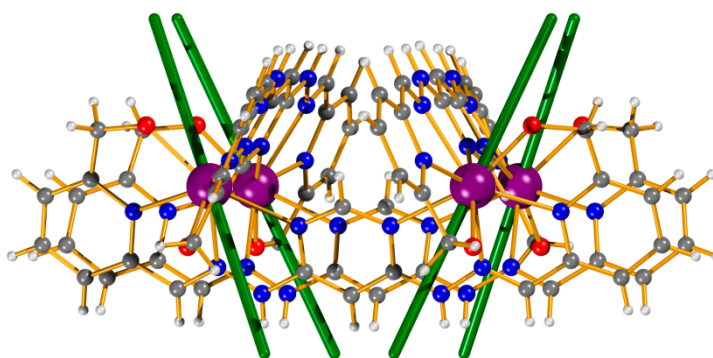

**Figure S20.** Side view of the orientations of the main magnetic axes of the ground state of  $\text{Dy}_4$ .

## S9. References

1. Uppadine, L.H.; Gisselbrecht, J.-P.; Kyritsakas, N.; Nättinen, K.; Rissanen, K.; Lehn, J.-M. Mixed-Valence, Mixed-Spin-State, and Heterometallic [2×2] Grid-type Arrays Based on Heteroditopic Hydrazone Ligands: Synthesis and Electrochemical Features. *Chem. Eur. J.* **2005**, *11*, 2549-2565, doi:10.1002/chem.200401224.
2. Join, B.; Möller, K.; Ziebart, C.; Schröder, K.; Gördes, D.; Thurow, K.; Spannenberg, A.; Junge, K.; Beller, M. Selective Iron-Catalyzed Oxidation of Benzylic and Allylic Alcohols. **2011**, *353*, 3023-3030, doi:https://doi.org/10.1002/adsc.201100210.
3. Casanova, D.; Alemany, P.; Bofill, J.M.; Alvarez, S. Shape and Symmetry of Heptacoordinate Transition-Metal Complexes: Structural Trends. *Chem. Eur. J.* **2003**, *9*, 1281-1295, doi:10.1002/chem.200390145.
4. Alvarez, S.; Llunell, M. Continuous symmetry measures of penta-coordinate molecules: Berry and non-Berry distortions of the trigonal bipyramid. *J. Chem. Soc. Dalton Trans.* **2000**, 10.1039/B004878J, 3288-3303, doi:10.1039/B004878J.

**Disclaimer/Publisher's Note:** The statements, opinions and data contained in all publications are solely those of the individual author(s) and contributor(s) and not of MDPI and/or the editor(s). MDPI and/or the editor(s) disclaim responsibility for any injury to people or property resulting from any ideas, methods, instructions or products referred to in the content.
